# Supplementary material
Source: Springer Nature journal article supplement (https://www.springermedizin.de/resource/supplementary/12245_2011_54_MOESM3_ESM.pdf/9672682)

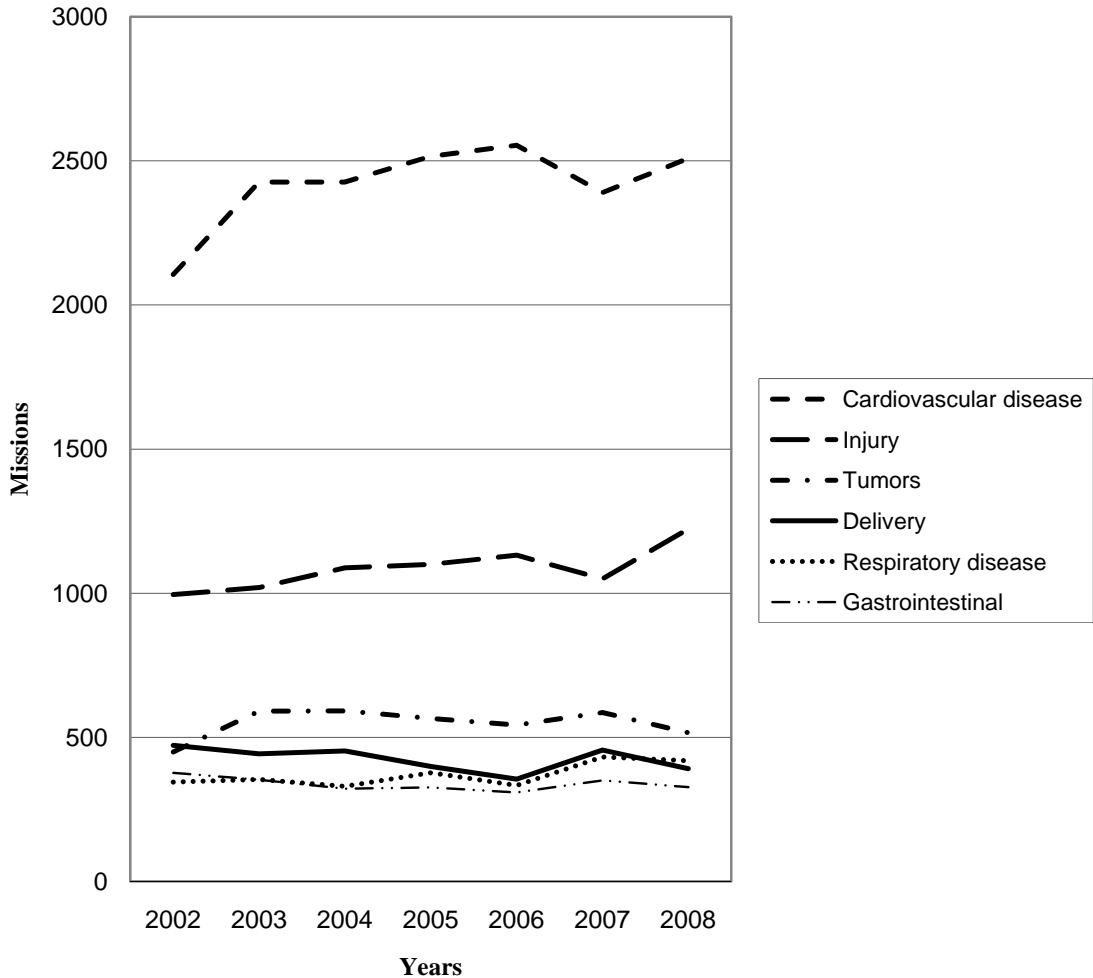

Supplement: MOESM3 [file 9672682]
